# Supplementary material for: Equivalence of Alcohol Use Disorder Symptom Assessments in Routine Clinical Care When Completed Remotely via Online Patient Portals Versus In Clinic via Paper Questionnaires: Psychometric Evaluation
Source: J Med Internet Res. 2024 Jul 22;26:e52101. doi: 10.2196/52101 (PMC11301125; doi:10.2196/52101)
Supplement: Multimedia Appendix 1 [file jmir_v26i1e52101_app1.docx]

**Supplement 1:** Study sample selection

**Supplement 2 caption:**

a The electronic health record will automatically ask patients to complete annual alcohol screening and/or remind in-clinic staff to administer alcohol screens to patients if patients have not completed screening in the year prior.

b There are several reasons patients may not have completed the Alcohol Symptom Checklist despite reporting high-risk drinking. First, patients who screened positive for depression and had suicidal thoughts were given a suicide risk assessment instead. Second, on May 30, 2021, the electronic health record prompts that automatically displayed the Alcohol Symptom Checklist after patients reported a high-risk alcohol use (AUDIT-C scores ≥7), were inadvertently disabled. However, a web-based version of the Alcohol Symptom Checklist may still have displayed through the online patient portal if patients had previously reported high-risk alcohol use or patients may have provided this information in-clinic. Third, patients may have declined to complete the Alcohol Symptom Checklist.

c Patients could skip any item on the Alcohol Symptom Checklist they did not want to answer. However, most completed all 11 items.

d Virtual appointments were by phone or video

e When completed in clinic, Alcohol Symptom Checklists are typically administered on paper. However, a small subset of patients may have completed the Alcohol Symptom Checklist verbally as part of a virtual visit. Responses to checklist items were recorded in clinic by check-in staff or medical assistants.

64 patients had missing items on the Alcohol-Symptom Checklistc Among them:

- 1 patient completed the checklist online
- 63 patients completed the checklist in clinic

187,276 patients did not report high-risk alcohol use on alcohol screening (AUDIT-C < 7)

1,245 patients did not complete the Alcohol Symptom Checklistb

3,243 patients included in analyses

191,828 patients were due for annual alcohol screening as part of routine primary care (i.e., had not completed alcohol screening in the year prior)a

604 patients had a virtual appointmentd

247 patients had a virtual appointmentd,e

4,552 patients reported high-risk alcohol use on alcohol screening (AUDIT-C ≥ 7)

3,307 patients completed an Alcohol Symptom Checklist

1,640 patients remotely completed the Alcohol Symptom Checklist via online patient portal before a primary care appointment

1,603 patients completed the Alcohol Symptom Checklist in clinic during check-in for a primary care appointment

1,036 patients had an office appointment

1,356 patients had an office appointment
